# Supplementary material for: Assessment of the Impact of Flow Changes and Water Management Rules in the Dam Reservoir on Energy Generation at the Jeziorsko Hydropower Plant
Source: MDPI journal article supplement (doi:10.3390/en15207695), 2022-10-18
Supplement: s1 [file s1]

**Table S1** Changes in air temperature and precipitation in station Puczniew in the period 1995-202.

| Period | Temperature |         |                     |         | Precipitation |         |                     |         |
|--------|-------------|---------|---------------------|---------|---------------|---------|---------------------|---------|
|        | S           | Z-value | Sen's Slope<br>(°C) | P-value | S             | Z-value | Sen's Slope<br>(mm) | P-value |
| Jan    | 23          | 0.48    | 0.042               | 0.628   | 77            | 1.68    | 0.806               | 0.094   |
| Feb    | 17          | 0.35    | 0.047               | 0.724   | -3            | -0.04   | -0.029              | 0.965   |
| Mar    | 93          | 2.03    | 0.082               | 0.043*  | -21           | -0.44   | -0.198              | 0.659   |
| Apr    | 39          | 0.84    | 0.042               | 0.402   | 1             | 0.00    | 0.002               | 1.000   |
| May    | -59         | -1.28   | -0.042              | 0.201   | -7            | -0.13   | -0.313              | 0.895   |
| Jun    | 119         | 2.60    | 0.088               | 0.009** | 5             | 0.09    | 0.072               | 0.930   |
| Jul    | 61          | 1.32    | 0.056               | 0.186   | -47           | -1.01   | -1.231              | 0.311   |
| Aug    | 91          | 1.98    | 0.060               | 0.047*  | 71            | 1.54    | 1.244               | 0.123   |
| Sep    | 111         | 2.42    | 0.095               | 0.015*  | 33            | 0.71    | 0.645               | 0.481   |
| Oct    | 39          | 0.84    | 0.047               | 0.402   | 17            | 0.35    | 0.302               | 0.724   |
| Nov    | 65          | 1.41    | 0.058               | 0.158   | -21           | -0.44   | -0.218              | 0.659   |
| Dec    | 105         | 2.29    | 0.124               | 0.022*  | 31            | 0.66    | 0.310               | 0.508   |
| Year   | 133         | 2.91    | 0.058               | 0.004** | 15            | 0.31    | 0.659               | 0.758   |

\*- significant at a level of 0.05, \*\*- significant at a level of 0.01

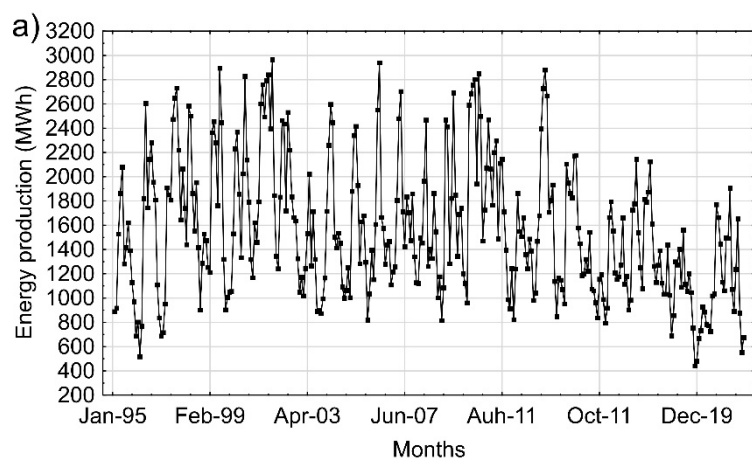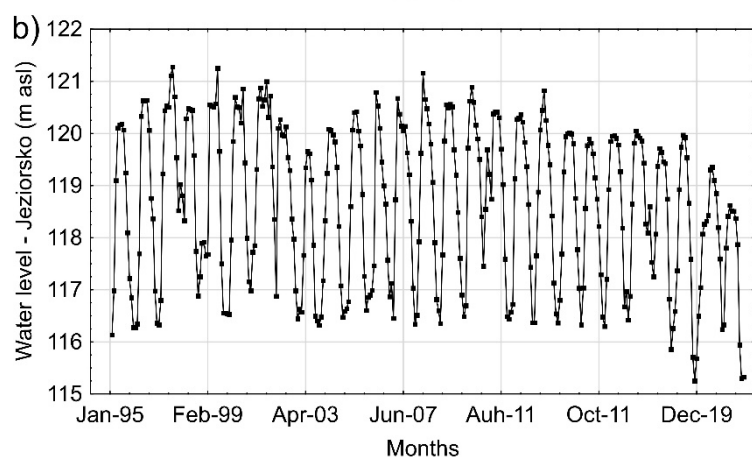

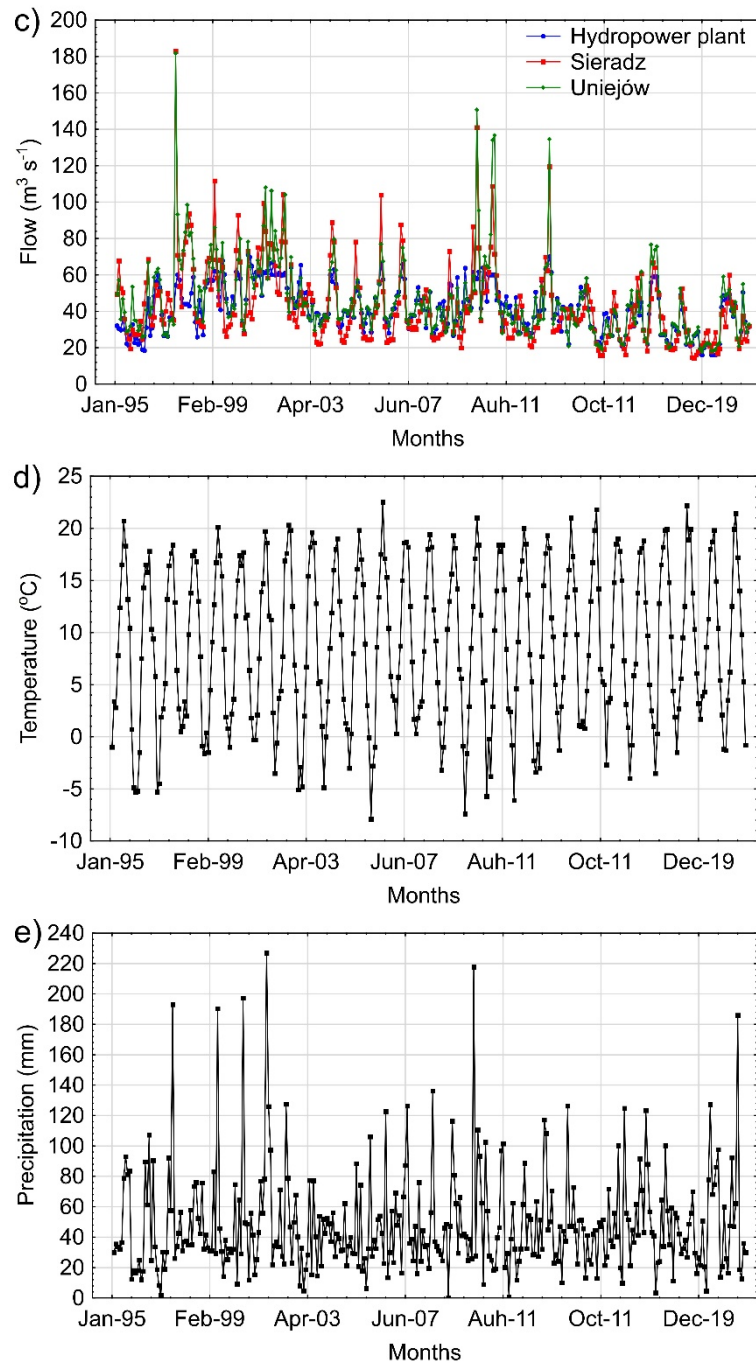

**Figure S1.** Monthly changes in energy production (a), water levels in the Jeziorsko dam reservoir (b), water flows through the hydropower plant, and at the Sieradz and Uniejów hydrological stations (c), air temperature (d) and precipitation (e) from 1995 to 2021.
